# Supplementary material
Source: publisher figshare collection journal article supplement (https://karger.figshare.com/articles/dataset/_/5120956)
Supplement: Supplementary file 1 [file 1]

Archive with 7 entries (7 files):
- 000266168_sm_Fig1.pdf
- 000266168_sm_Fig1.tif
- 000266168_sm_Fig2.pdf
- 000266168_sm_Fig2.tif
- 000266168_sm_Fig3.pdf
- 000266168_sm_Fig3.tif
- 000266168_sm_legends.pdf
