# Supplementary material
Source: publisher figshare collection journal article supplement (https://karger.figshare.com/articles/dataset/_/5120956)
Supplement: Supplementary file 1 [file 1 › 000266168_sm_Fig1.pdf]

|          |                                                                |      |
|----------|----------------------------------------------------------------|------|
| bDDX3Y-L | TCATTCAAGAGAGTTTGTTCCTCGGTAGACCAACCTGTGAGCCGGTTC               | 60   |
| bDDX3Y-S | TCATTCAAGAGAGTTTGTTCCTCGGTAGACCAACCTGTGAGCCGGTTC               | 60   |
| bDDX3Y-L | TTCAAATACTGATACGCTAGACAAGCCATTTGAGACAGAGTT                     | 120  |
| bDDX3Y-S | TTCAAATACTGATACGCTAGACAAGCCATTTGAGACAGAGTT                     | 120  |
|          | M                                                              |      |
| bDDX3Y-L | TGAGTCATGAGGCGGTGAAAAACGTGCAGGAGGTGGATCAGCAGTTGGCTGATCTAAACC   | 180  |
| bDDX3Y-S | TGAGTCATGAGGCGGTGAAAAACGTGCAGGAGGTGGATCAGCAGTTGGCTGATCTAAACC   | 180  |
|          | S H E A V K N V Q E V D Q Q L A D L N L                        |      |
| bDDX3Y-L | TGAACCTCTGATAATAATCAGAGTGGAGGAGGAAGTACAGCTAGCAAAGGGCGCTATATAC  | 240  |
| bDDX3Y-S | TGAACCTCTGATAATAATCAGAGTGGAGGAGGAAGTACAGCTAGCAAAGGGCGCTATATAC  | 240  |
|          | N S D N N Q S G G G S T A S K G R Y I P                        |      |
| bDDX3Y-L | CACCTCACTTAAGGAATAGGGAAGCATCTAAAGGATTTTATGGTAAAGGCAGTT         | 300  |
| bDDX3Y-S | CACCTCACTTAAGGAATAGGGAAGCATCTAAAGGATTTTATGGTAAAGGCAGTT         | 300  |
|          | P H L R N R E A S K G F Y G K G S S G W                        |      |
| bDDX3Y-L | GGAGTTGTAGTAAAGAAAAGGATGCCTACAGCAGTTTTGGATCTCGAGATTCAAGAGGAA   | 360  |
| bDDX3Y-S | GGAGTTGTAGTAAAGAAAAGGATGCCTACAGCAGTTTTGGATCTCGAGATTCAAGAGGAA   | 360  |
|          | S C S K E K D A Y S S F G S R D S R G R                        |      |
| bDDX3Y-L | GACCCAGTTACTTCAGTGATCGAGGAAGTGGATCAAGGGGAAGGTTTGATGATCGTGGGC   | 420  |
| bDDX3Y-S | GACCCAGTTACTTCAGTGATCGAGGAAGTGGATCAAGGGGAAGGTTTGATGATCGTGGGC   | 420  |
|          | P S Y F S D R G S G S R G R F D D R G R                        |      |
| bDDX3Y-L | GGAAATGAGTGTGAAGGTTTTTGGCAGTCGTGGTGACAGAACTGGCTTTGGCAGATTTGAGC | 480  |
| bDDX3Y-S | GGAAATGAGTGTGAAGGTTTTTGGCAGTCGTGGTGACAGAACTGGCTTTGGCAGATTTGAGC | 480  |
|          | N E C E G F G S R G D R T G F G R F E R                        |      |
| bDDX3Y-L | GTAGTGACACAGTCGTTGGTGTGACAAGTCAGATGATGATGACTGGTCAAACCGCTTC     | 540  |
| bDDX3Y-S | GTAGTGACACAGTCGTTGGTGTGACAAGTCAGATGATGATGACTGGTCAAACCGCTTC     | 540  |
|          | S G H S R W C D K S D D D D W S K P L P                        |      |
| bDDX3Y-L | CACCAAGTGAACGCTTGGAGCAGGAGCTCTTTTCTGGAGGAAACACTGGGATTAACCTTG   | 600  |
| bDDX3Y-S | CACCAAGTGAACGCTTGGAGCAGGAGCTCTTTTCTGGAGGAAACACTGGGATTAACCTTG   | 600  |
|          | P S E R L E Q E L F S G G N T G I N F E                        |      |
| bDDX3Y-L | AGAAATATGATGATATACCAGTAGAGGTAACCGGCAATAACTGTCCTCCGCACATTGAAA   | 660  |
| bDDX3Y-S | AGAAATATGATGATATACCAGTAGAGGTAACCGGCAATAACTGTCCTCCGCACATTGAAA   | 660  |
|          | K Y D D I P V E V T G N N C P P H I E S                        |      |
| bDDX3Y-L | GTTTCAGCGATGTTGCAATGGGAGAAATTATTATGGGAAACATTGAGCTTACTCGTTACA   | 720  |
| bDDX3Y-S | GTTTCAGCGATGTTGCAATGGGAGAAATTATTATGGGAAACATTGAGCTTACTCGTTACA   | 720  |
|          | F S D V A M G E I I M G N I E L T R Y T                        |      |
| bDDX3Y-L | CACGTCCTACTCCAGTGCAAAAACATGCCATTCCCATTATTAAGAAAAAAGGGACCTGA    | 780  |
| bDDX3Y-S | CACGTCCTACTCCAGTGCAAAAACATGCCATTCCCATTATTAAGAAAAAAGGGACCTGA    | 780  |
|          | R P T P V Q K H A I P I I K E K R D L M                        |      |
| bDDX3Y-L | TGGCCTGTGCCCAGACAGGGTCTGGGAAAACCTGCAGCATTCTTTTGCCCATCTTGAGTC   | 840  |
| bDDX3Y-S | TGGCCTGTGCCCAGACAGGGTCTGGGAAAACCTGCAGCATTCTTTTGCCCATCTTGAGTC   | 840  |
|          | A C A Q T G S S G K T A A F L L P I L S Q                      |      |
| bDDX3Y-L | AGATTTATACAGATGGTCCAGGCGAGGCTTTGAAAGCTGTGAAGGAAAGTGAAGGTATG    | 900  |
| bDDX3Y-S | AGATTTATACAGATGGTCCAGGCGAGGCTTTGAAAGCTGTGAAGGAAAGTGAAGGTATG    | 900  |
|          | I Y T D G P G E A L K A V K E S G R Y G                        |      |
| bDDX3Y-L | GACGCCGTAAACAGTATCCAATCTCCTTGGTTTTAGCCCCAACAAAGAGAGTTGGCTGTAC  | 960  |
| bDDX3Y-S | GACGCCGTAAACAGTATCCAATCTCCTTGGTTTTAGCCCCAACAAAGAGAGTTGGCTGTAC  | 960  |
|          | R R K Q Y P I S L V L A P T R E L A V Q                        |      |
| bDDX3Y-L | AGATCTATGAGGAAGCCAGGAAATTTTCATACCGGTCTCGAGTTCTTCTTGTGTGGTAT    | 1020 |
| bDDX3Y-S | AGATCTATGAGGAAGCCAGGAAATTTTCATACCGGTCTCGAGTTCTTCTTGTGTGGTAT    | 1020 |
|          | I Y E E A R K F S Y R S R V L P C V V Y                        |      |
| bDDX3Y-L | ACGGTGGTGCTGATATTGGTCAACAAATTCGAGACTTAGAACGTGGATGTCACCTTGTGG   | 1080 |
| bDDX3Y-S | ACGGTGGTGCTGATATTGGTCAACAAATTCGAGACTTAGAACGTGGATGTCACCTTGTGG   | 1080 |
|          | G G A D I G Q Q I R D L E R G C H L L V                        |      |
| bDDX3Y-L | TGGCCACTCCAGGACGCCTGGTGGATATGATGGAAAGGGGAAAGATTGGGTTAGATTCT    | 1140 |
| bDDX3Y-S | TGGCCACTCCAGGACGCCTGGTGGATATGATGGAAAGGGGAAAGATTGGGTTAGATTCT    | 1140 |
|          | A T P G R L V D M M E R G K I G L D F C                        |      |
| bDDX3Y-L | GCAAATACTTGGTGTGGATGAAGCTGATAGGATGCTGGATATGGGATTGAACCTCAGA     | 1200 |
| bDDX3Y-S | GCAAATACTTGGTGTGGATGAAGCTGATAGGATGCTGGATATGGGATTGAACCTCAGA     | 1200 |
|          | K Y L V L D E A D R M L D M G F E P Q I                        |      |
| bDDX3Y-L | TACGTCGTATAATTGAACAAGACACTATGCCACCAAAGGGTGTCGCCATACCATGATGT    | 1260 |
| bDDX3Y-S | TACGTCGTATAATTGAACAAGACACTATGCCACCAAAGGGTGTCGCCATACCATGATGT    | 1260 |
|          | R R I I E Q D T M P P K G V R H T M M F                        |      |
| bDDX3Y-L | TTAGTGCTACTTTTCCTAAGGAAATTCAGATGCTTGCTCGTGATTTCTTGGATGAATATA   | 1320 |
| bDDX3Y-S | TTAGTGCTACTTTTCCTAAGGAAATTCAGATGCTTGCTCGTGATTTCTTGGATGAATATA   | 1320 |
|          | S A T F P K E I Q M L A R D F L D E Y I                        |      |
| bDDX3Y-L | TCTTTCTGGCCGTAGGTAGAGTTGGCTCTACCTCTGAGAACATCACACAAAAAGTAGTTT   | 1380 |
| bDDX3Y-S | TCTTTCTGGCCGTAGGTAGAGTTGGCTCTACCTCTGAGAACATCACACAAAAAGTAGTTT   | 1380 |
|          | F L A V G R V G S T S E N I T Q K V V W                        |      |
| bDDX3Y-L | GGGTGGAAGAGGCAGACAAACGGTCATTTCTGCTTGATCTCTTAAATGCAACAGGGACAG   | 1440 |
| bDDX3Y-S | GGGTGGAAGAGGCAGACAAACGGTCATTTCTGCTTGATCTCTTAAATGCAACAGGGACAG   | 1440 |
|          | V E E A D K R S F L L D L L N A T G T D                        |      |
| bDDX3Y-L | ATTCACTGACTTTAGTTTTTTGTGGAGACAAAAAGGGGGCTGATTCTTTGGAGGATTCT    | 1500 |
| bDDX3Y-S | ATTCACTGACTTTAGTTTTTTGTGGAGACAAAAAGGGGGCTGATTCTTTGGAGGATTCT    | 1500 |
|          | S L T L V F V E T K K G A D S L E D F L                        |      |
| bDDX3Y-L | TATACCATGAAGGATATGCTTGTACAAGTATCCATGGAGACCGATCACAGAGAGATAGAG   | 1560 |
| bDDX3Y-S | TATACCATGAAGGATATGCTTGTACAAGTATCCATGGAGACCGATCACAGAGAGATAGAG   | 1560 |
|          | Y H E G Y A C T S I H G D R S Q R D R E                        |      |
| bDDX3Y-L | AGGAAGCACTTCATCAGTTCGGCTCAGGAAAAAGCCCAATTCTAGTGGCTACTGCTGTGG   | 1620 |
| bDDX3Y-S | AGGAAGCACTTCATCAGTTCGGCTCAGGAAAAAGCCCAATTCTAGTGGCTACTGCTGTGG   | 1620 |
|          | E A L H Q F R S G K S P I L V A T A V A                        |      |
| bDDX3Y-L | CAGCAAGAGGACTAGACATTTCAAATGTGAAACATGTCATCAATTTTGATTGGCAGGTG    | 1680 |
| bDDX3Y-S | CAGCAAGAGGACTAGACATTTCAAATGTGAAACATGTCATCAATTTTGATTGGCAGGTG    | 1680 |
|          | A R G L D I S N V K H V I N F D L P G D                        |      |
| bDDX3Y-L | ATATTGAGGAATATGTACATCGGATTGGCCGTACAGGACGTGTAGGAAACCTTGGTCTTG   | 1740 |
| bDDX3Y-S | ATATTGAGGAATATGTACATCGGATTGGCCGTACAGGACGTGTAGGAAACCTTGGTCTTG   | 1740 |
|          | I E E Y V H R I G R T G R V G N L G L A                        |      |
| bDDX3Y-L | CCACCTCATTTTTCAATGAAAGAAATATAAATATCTCAAAGATTTGTTGGATCTTCTTG    | 1800 |
| bDDX3Y-S | CCACCTCATTTTTCAATGAAAGAAATATAAATATCTCAAAGATTTGTTGGATCTTCTTG    | 1800 |
|          | T S F F N E R N I N I S K D L L D L L V                        |      |
| bDDX3Y-L | TTGAAGCCAAACAAGAAGTGCCATCTTGGTTAGAAAACATGGCTTATGAACACCACTATA   | 1860 |
| bDDX3Y-S | TTGAAGCCAAACAAGAAGTGCCATCTTGGTTAGAAAACATGGCTTATGAACACCACTATA   | 1860 |
|          | E A K Q E V P S W L E N M A Y E H H Y K                        |      |
| bDDX3Y-L | AGAGTAGCAATCGTGGCCGTTCTAGGAGATTCAGTGGAGGCTTTGGTGCCCGTGATTATC   | 1920 |
| bDDX3Y-S | AGAGTAGCAATCGTGGCCGTTCTAGGAGATTCAGTGGAGGCTTTGGTGCCCGTGATTATC   | 1920 |
|          | S S N R G R S R R F S G G F G A R D Y R                        |      |
| bDDX3Y-L | GACAAAGTAGCAGTTCTGGCAGTTTCAGCTATAGTAGTGGTCGTGCAGGCAGCAGCCGCA   | 1980 |
| bDDX3Y-S | GACAAAGTAGCAGTTCTGGCAGTTTCAGCTATAGTAGTGGTCGTGCAGGCAGCAGCCGCA   | 1980 |
|          | Q S S S S G S F S Y S S G R A G S S R S                        |      |
| bDDX3Y-L | GTGGTGGAGGTGCTCATGGCAGCAGCAGAGGATTTGGTGGAGGTAGTGGCTATGGAGGCT   | 2040 |
| bDDX3Y-S | GTGGTGGAGGTGCTCATGGCAGCAGCAGAGGATTTGGTGGAGGTAGTGGCTATGGAGGCT   | 2037 |
|          | G G G A H G S S R G F G G G S G Y G G F                        |      |
| bDDX3Y-L | TCTACAGTAGTGAAGGATATGGCGGAAATTACAGCTCTCAGGGGGTTGACTGGTGGGGCA   | 2100 |
| bDDX3Y-S | TCTACAGTAGTGAAGGATATGGCGGAAATTACAGCTCTCAGGGGGTTGACTGGTGGGGCA   | 2097 |
|          | Y S S E G Y G G N Y S S Q G V D W W G N                        |      |
| bDDX3Y-L | ACGGAATCTGCTTTCCAGCCAAGTCACTTAAAAAAAAGCTACAATGGAAACCACATGTAA   | 2160 |
| bDDX3Y-S | ACGGAATCTGCTTTCCAGCCAAGTCACTTAAAAAAAAGCTACAATGGAAACCACA-----   | 2157 |
|          | *                                                              |      |
| bDDX3Y-L | CTTGGCCAGATTGTTTTGTGTATAAAGGAGATCTTGTAGTGCATTACCCATAGTGATICT   | 2220 |
| bDDX3Y-S | -----                                                          | 2179 |
| bDDX3Y-L | CCTGAAAATTCAAGGGAGCTTAAAGCCAAAAGAAAGAAAAAGAACACCAATAATTCCAT    | 2280 |
| bDDX3Y-S | -----                                                          |      |
| bDDX3Y-L | TGGTTTGAAAACCTTAATTGCTGTAGTTTGGATGAACCTCCCTCTGCTTGTTCACCCCA    | 2340 |
| bDDX3Y-S | -----                                                          |      |
| bDDX3Y-L | AACIGCATTTTATAATTTTGTGATTGAGGATCATTTGTTTGTTAATGTACTCTGACTTTAT  | 2400 |
| bDDX3Y-S | -----                                                          |      |
| bDDX3Y-L | AGACAGATTATTTGATGTCCGTTGGCTCAGTAATGCTCAAGTTTTCAGTTGTGTTTCATGA  | 2460 |
| bDDX3Y-S | -----                                                          |      |
| bDDX3Y-L | AATAAGTTCACTAAATTTGGGCTAAGATCACACCTTGGCACACAGATGTGATACAACCTTA  | 2520 |
| bDDX3Y-S | -----                                                          |      |
| bDDX3Y-L | TTTAACAGGAATTGTTAATTTATTTATAAGTATTACAAAGTAAGAAAACCTTGAGCAGTAA  | 2580 |
| bDDX3Y-S | -----                                                          |      |
| bDDX3Y-L | CTTGCAATTGGACTTAATGTTTGGAGATTGGGGAGAAAAATACCTTACAGCAGAATTCCT   | 2640 |
| bDDX3Y-S | -----                                                          |      |
| bDDX3Y-L | TCTGATGTGGCAAACCTGTACTAATTTAACTTTGTATTTGCTCATTCTATCTGGATAGGCA  | 2700 |
| bDDX3Y-S | -----                                                          |      |
| bDDX3Y-L | TTTATAGTCTATAAATAAGCCATTCTGGTCATGATAAGATTACATGTATGAATACATCCA   | 2760 |
| bDDX3Y-S | -----                                                          |      |
| bDDX3Y-L | TATATTTTC                                                      | 2769 |
| bDDX3Y-S | -----                                                          |      |
