# Supplementary material
Source: publisher figshare collection journal article supplement (https://karger.figshare.com/articles/dataset/_/5120956)
Supplement: Supplementary file 1 [file 1 › 000266168_sm_legends.pdf]

**Supplementary Fig. 1.** Alignment of the full-length *bDDX3Y*-L and -S cDNA and the predicted *bDDX3Y* amino acid sequence. The start and stop codons as well as the 3-bp indel (insertion/deletion) are highlighted.

**Supplementary Fig. 2.** Schematic representation of the *bDDX3Y* genomic structure and transcript variants. Exons are numbered on the top, and are proportional to their sizes. The poly(A) ( $A_n$ ) and the alternative poly(A) site are indicated. The star indicates the position where 3 bp is inserted in *bDDX3Y*-L.

**Supplementary Fig. 3.** Expression of both *bDDX3X* and *bPL10* in the testis demonstrated by RT-PCR. Primers PL10-1014F/1967R (Table 1) flanking the 202-bp-insertion in the *bPL10* amplified two specific fragments 954 and 752 bp. Sequencing of the fragments confirmed that the 954-bp was amplified from the *bPL10*, whereas the 752-bp was from *bDDX3X*.
