# Supplementary material
Source: publisher figshare collection journal article supplement (https://karger.figshare.com/articles/dataset/_/5120956)

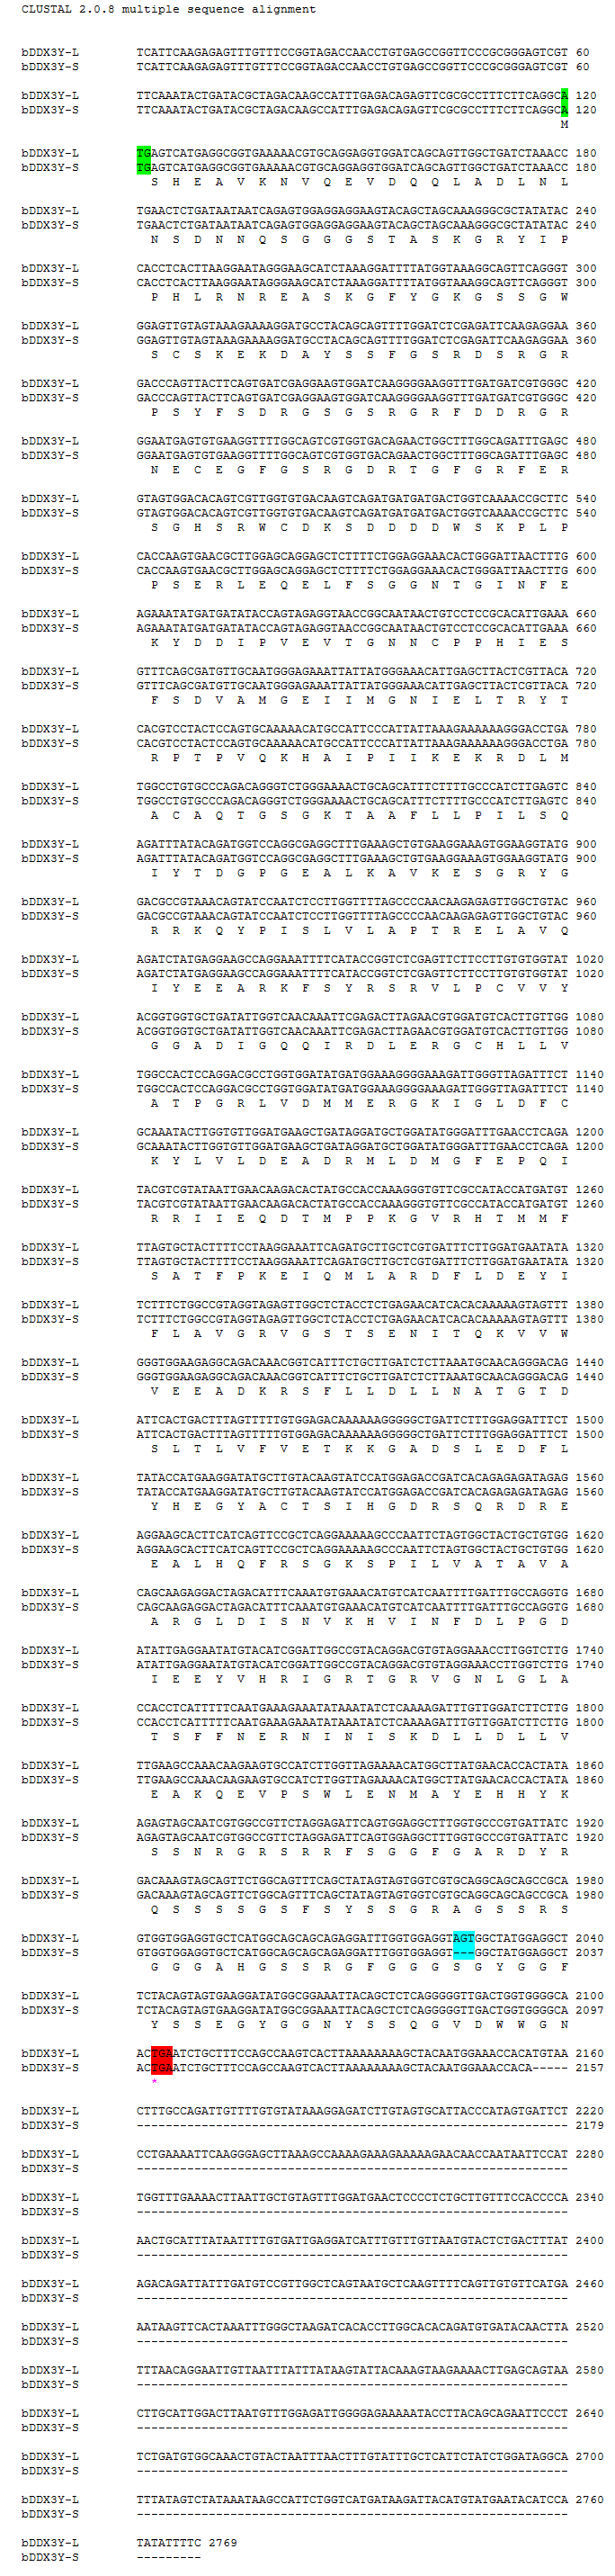

Supplement: Supplementary file 1 [file 1 › 000266168_sm_Fig1.tif]

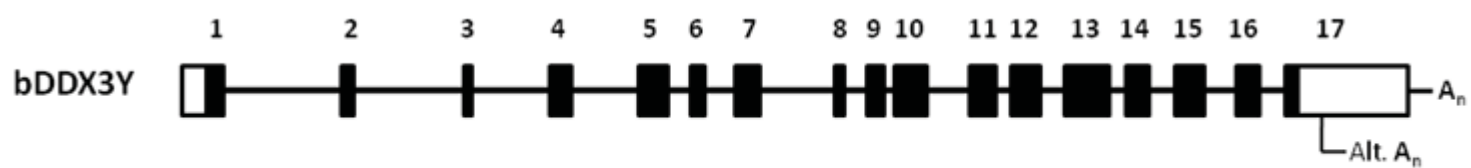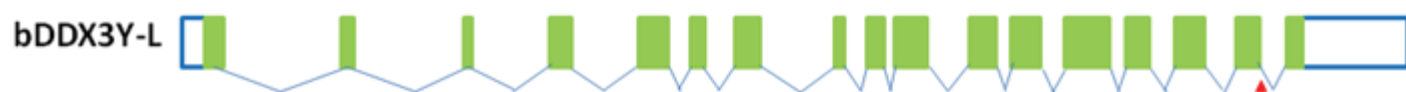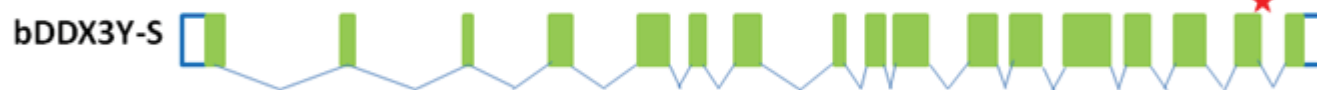

Supplement: Supplementary file 1 [file 1 › 000266168_sm_Fig2.pdf]

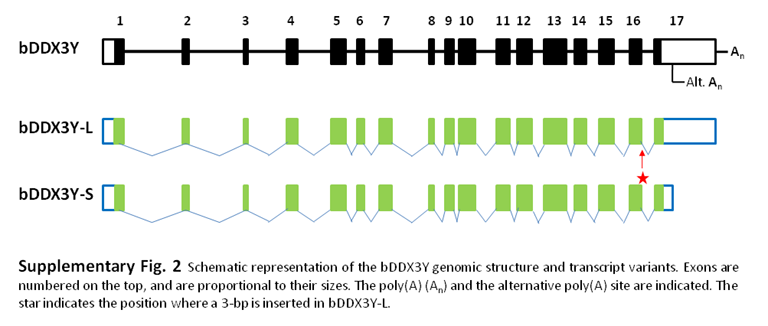

Supplement: Supplementary file 1 [file 1 › 000266168_sm_Fig2.tif]

1 Kb

Testis RNA

H<sub>2</sub>O

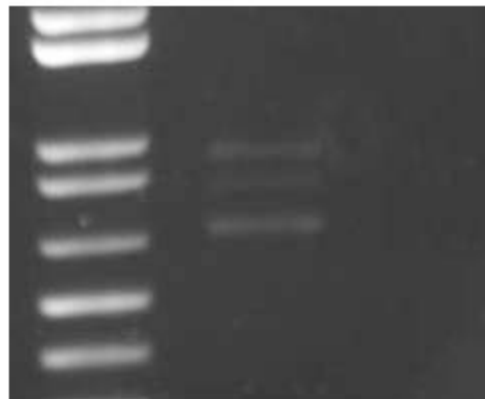

954 bp

752 bp

Supplement: Supplementary file 1 [file 1 › 000266168_sm_Fig3.pdf]

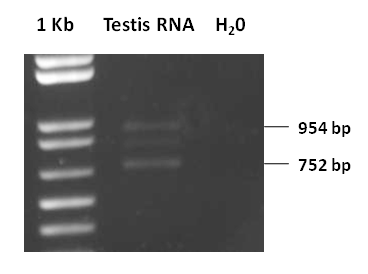

Supplement: Supplementary file 1 [file 1 › 000266168_sm_Fig3.tif]
